# Supplementary material
Source: PubMed Central journal article supplement (PMC8260620)
Supplement: NIHMS1660737-supplement-1.pdf [file NIHMS1660737-supplement-1.pdf]

**Figure S1. Participant flow diagram**

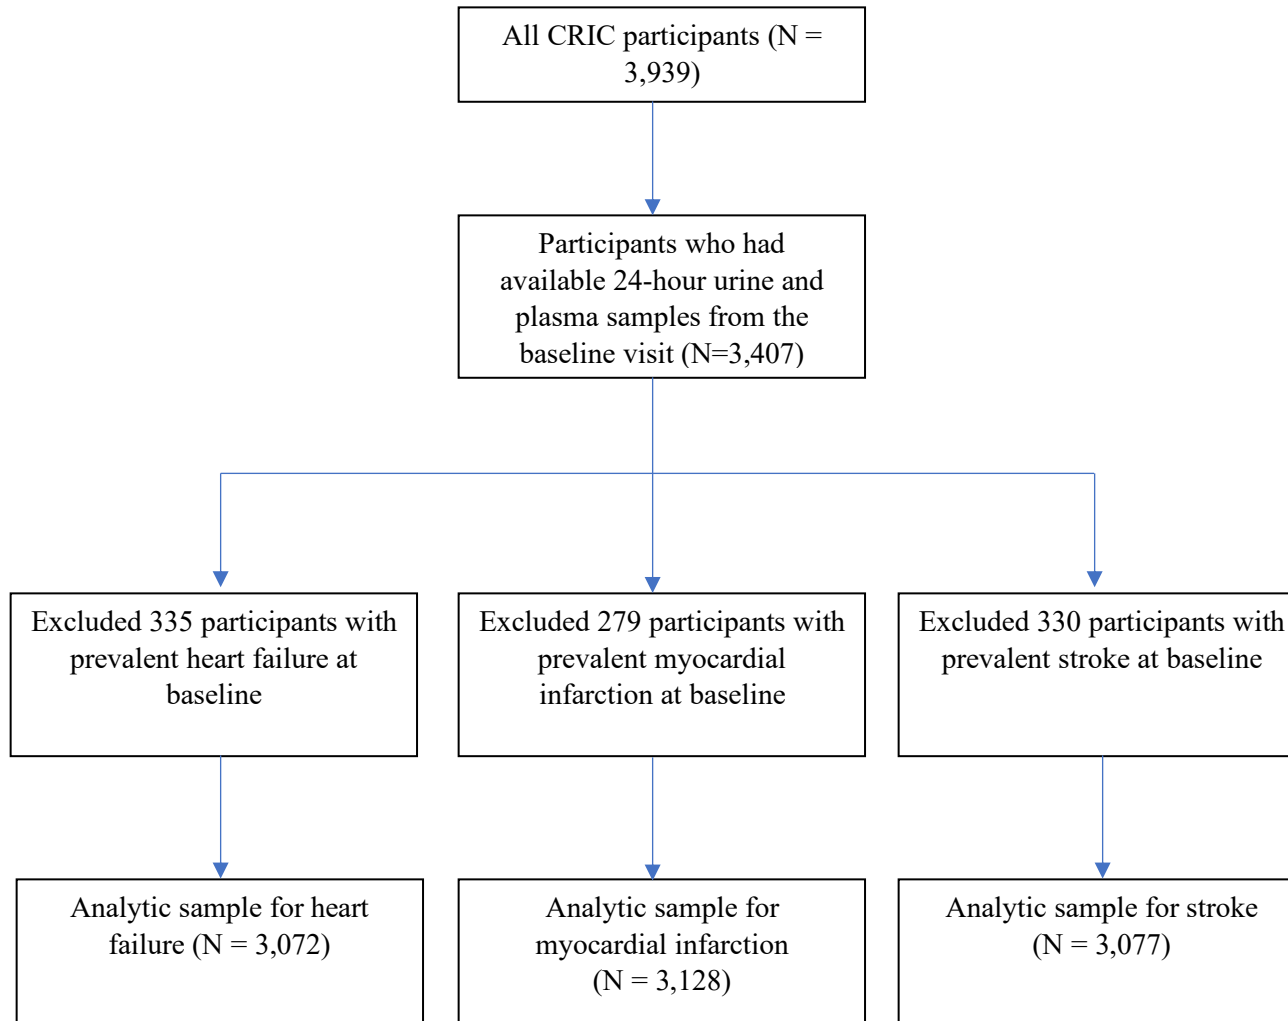

**Figure S2. Distribution of the summary secretion score.**

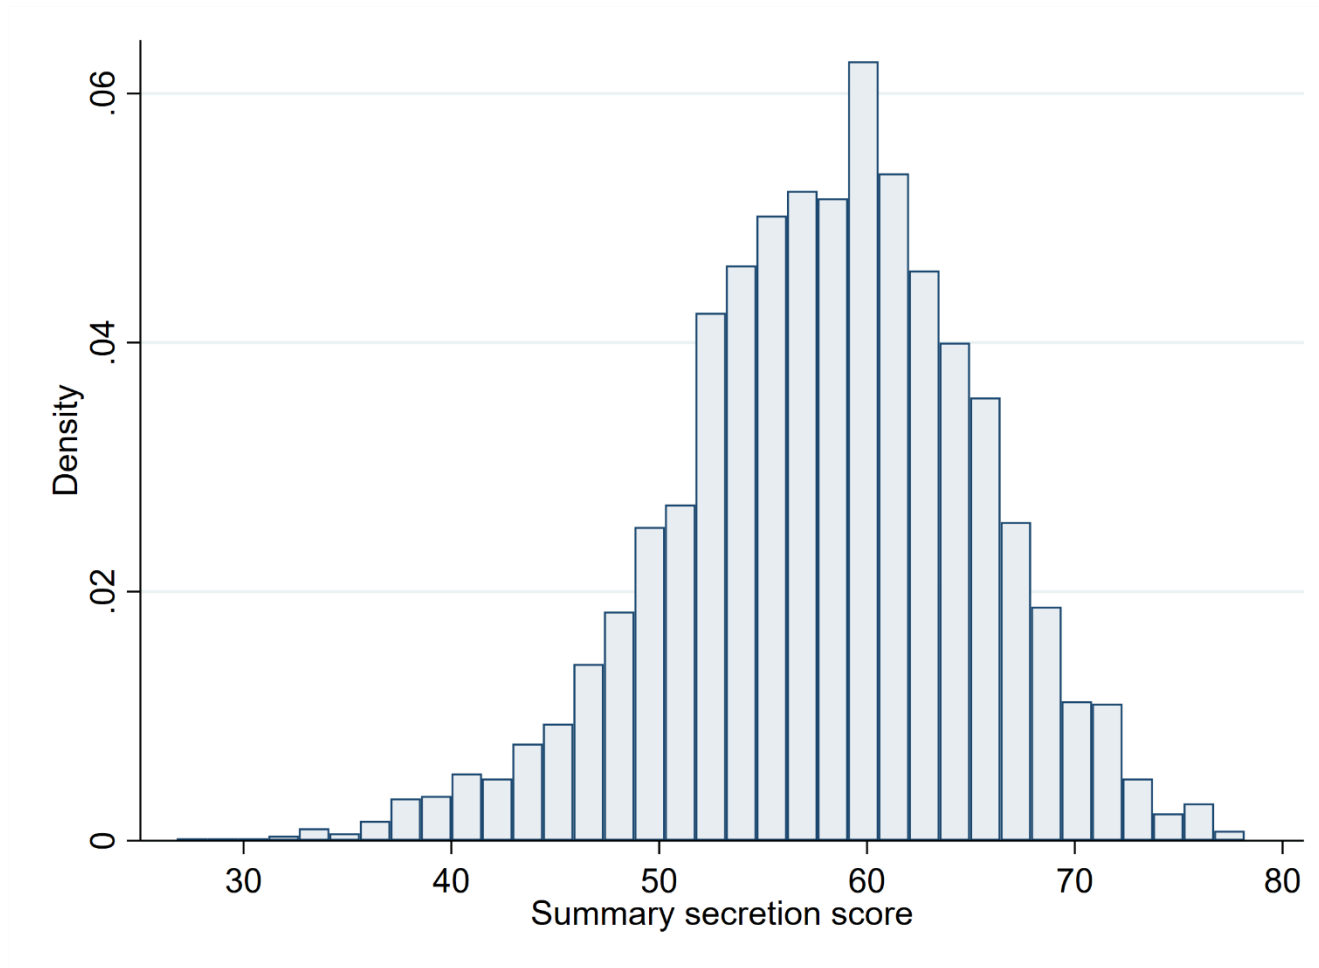

**Figure S3. Association of summary secretion score with incident heart failure (i), myocardial infarction (ii), and stroke (iii)** <sup>a, b, c</sup>

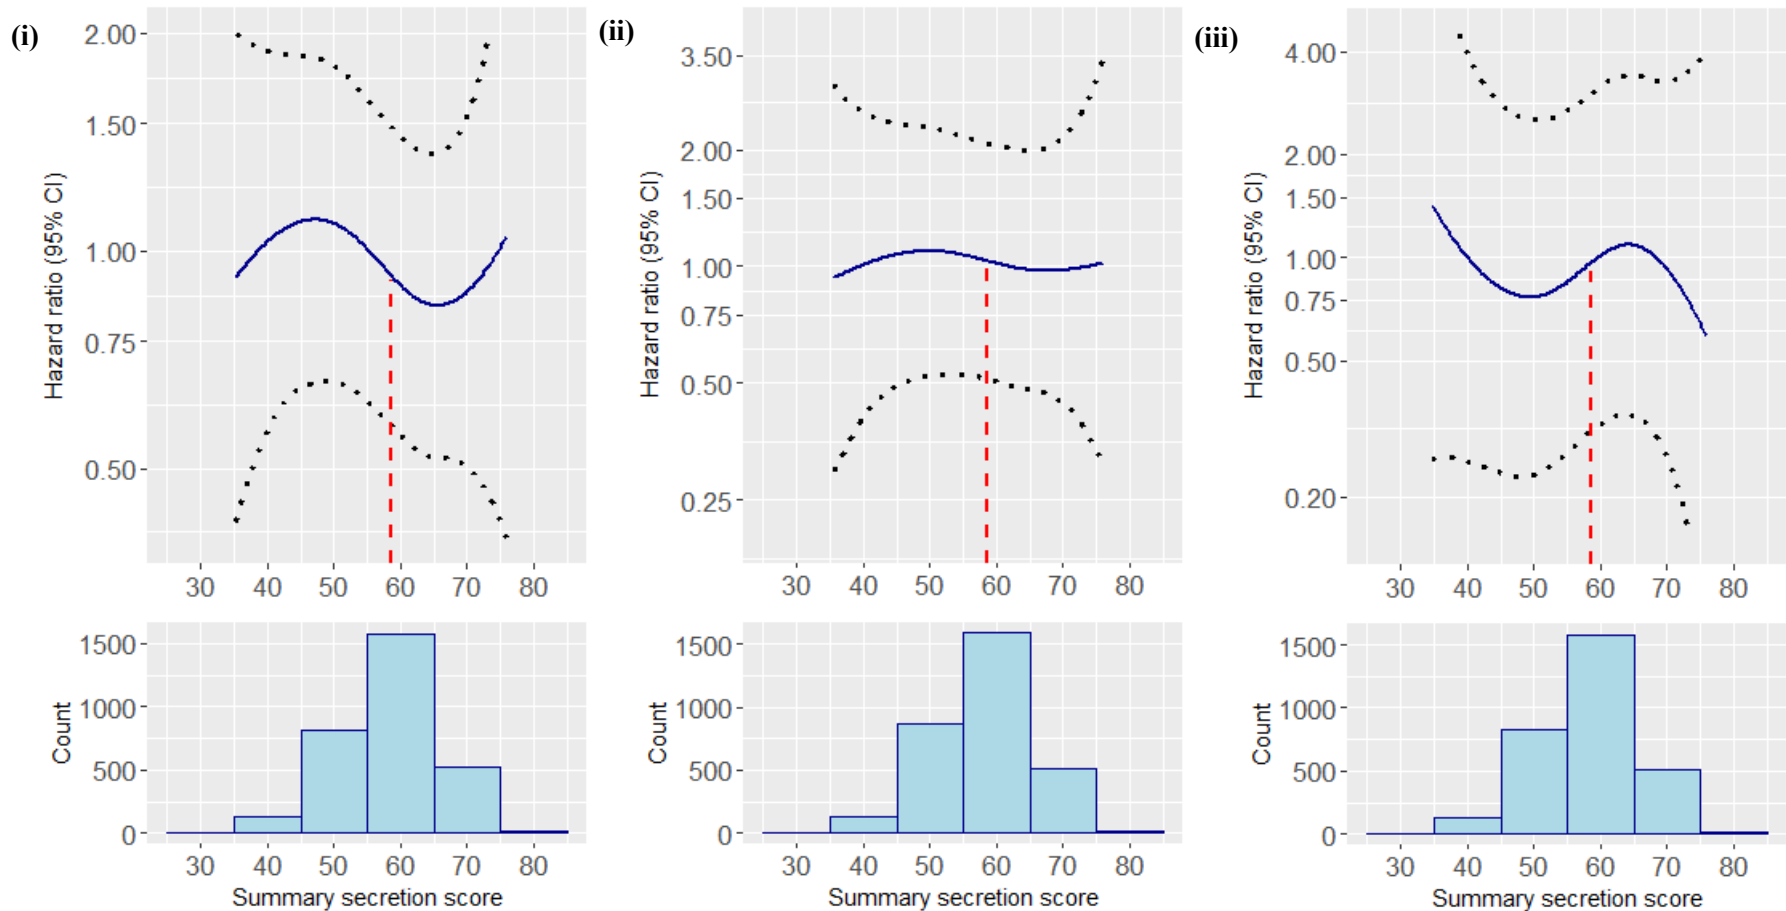

<sup>a</sup> Hazard ratio adjusted for age, race, sex, clinical sites, educational attainment, smoking status, history of cardiovascular disease, diabetes, body mass index, systolic blood pressure, triglyceride, 24-hour urinary albumin excretion, ACEi/ARB, loop diuretics, beta blockers, and estimated GFR.

<sup>b</sup> Hazard ratio predicted using restricted cubic splines with two knots placed at the 20<sup>th</sup> and the 80<sup>th</sup> percentiles of the summary secretion score. P-values for non-linearity at two knots were 0.2 and 0.3 for heart failure; 0.6 and 0.7 for myocardial infarction; and 0.2 and 0.2 for stroke.

<sup>c</sup> Vertical dashed lines represent the median of the summary secretion score.

## Item S1. Supplemental Methods

### Chemicals

Formic acid was purchased from Fisher or EMD, LC-MS grade water, methanol, and ammonium hydroxide from Fisher, DMSO from Pierce, d<sub>6</sub>-DMSO from EMD, and D<sub>2</sub>O from Cambridge Isotopes.

Table a of Item S1: Analyte and internal standard vendors and solid phase extraction used for urine

| Compound (endogenous) | Vendor                                 | Compound (IS)                  | Vendor                                   | SPE for urine |
|-----------------------|----------------------------------------|--------------------------------|------------------------------------------|---------------|
| 3-Hydroxy hippurate   | Toronto Research Chemicals PN: H943125 |                                |                                          | MCX           |
| Adipic acid           | Sigma PN: 09582-50G                    | Adipic acid (13C6)             | Cambridge Isotopes PN: CLM-4723-0.1      | MCX           |
| Cinnamoylglycine      | Sigma PN: S658200-25MG                 | Cinnamoylglycine (2H2)         | Medical Isotopes PN: D32615              | MCX           |
| Dimethyluric acid     | Toronto Research Chemicals PN: D479695 | Dimethyluric acid (13C4,15N3)  | Sigma PN: 705640                         | MCX           |
| Hippurate             | Sigma PN: 112003-5G                    | Hippuric acid (2H5)            | Toronto Research Chemicals PN: H356702   | MCX           |
| Indoxyl sulfate       | Sigma PN: I3875-250MG                  | Indoxyl sulfate (13C6)         | Sigma PN: 809780-1MG                     | MCX           |
| Isovalerylglycine     | Toronto Research Chemicals PN: I917600 | Isovalerylglycine (2H2)        | CDN Isotopes PN: D-6230                  | MCX           |
| Kynurenic acid        | Sigma PN: K3375-250MG                  | Kynurenic acid (2H5)           | Toronto Research Chemicals PN: K660502   | HLB           |
| Pantothenic acid      | Sigma PN: 21210-5G-F                   |                                |                                          | HLB           |
| p-cresol-sulfate      | Collaborator Provided                  | p-Cresol sulfate (2H7)         | Collaborator Provided                    | MCX           |
| Pyridoxic acid        | Sigma PN: P9630-25MG                   | Pyridoxic acid (2H3)           | Toronto Research Chemicals PN: P991877   | MCX           |
| Suberic acid          | Sigma PN: 60930-100G                   |                                |                                          | MCX           |
| Succinic acid         | Sigma PN: S3674-100G                   | Succinic acid (13C4)           | Toronto Research Chemicals PN: S688767   | HLB           |
| Tiglylglycine         | Toronto Research Chemicals PN: T440100 | Tirlylglycine (13C2,15N)       | Toronto Research Chemicals PN: H-T440102 | MCX           |
| Trimethyluric acid    | Toronto Research Chemicals PN: T797995 | Trimethyluric acid (13C4,15N3) | Sigma PN: 705667-5MG                     | MCX           |
| Xanthosine            | Toronto Research Chemicals PN: X742100 |                                |                                          | MCX           |

**Internal standard mix**

All internal standards were combined in a single tube and the volume brought to 20 mL with methanol. The concentration of each analyte in the internal standard mix is listed in Table b.

Table b of Item S1:

| Internal Standard                                                                  | IS Stock Solvent | Working Concentration (ug/mL) |
|------------------------------------------------------------------------------------|------------------|-------------------------------|
| Adipic acid ( <sup>13</sup> C <sub>6</sub> )                                       | MeOH             | 25                            |
| Cinnamoylglycine ( <sup>2</sup> H <sub>2</sub> )                                   | MeOH             | 0.025                         |
| Dimethyluric acid ( <sup>13</sup> C <sub>4</sub> , <sup>15</sup> N <sub>3</sub> )  | MeOH             | 10                            |
| Hippuric acid ( <sup>2</sup> H <sub>5</sub> )                                      | DMSO             | 1                             |
| Indoxyl sulfate ( <sup>13</sup> C <sub>6</sub> )                                   | DMSO             | 5                             |
| Isovaleryl glycine ( <sup>2</sup> H <sub>2</sub> )                                 | DMSO             | 0.25                          |
| Kynurenic acid ( <sup>2</sup> H <sub>5</sub> )                                     | DMSO             | 0.5                           |
| p-Cresol sulfate ( <sup>2</sup> H <sub>7</sub> )                                   | 75%ACN/25%MeOH   | 2.5                           |
| Pyridoxic acid ( <sup>2</sup> H <sub>3</sub> )                                     | DMSO             | 0.5                           |
| Succinic acid ( <sup>13</sup> C <sub>4</sub> )                                     | MeOH             | 100                           |
| Tirlylglycine ( <sup>13</sup> C <sub>2</sub> , <sup>15</sup> N)                    | MeOH             | 1                             |
| Trimethyluric acid ( <sup>13</sup> C <sub>4</sub> , <sup>15</sup> N <sub>3</sub> ) | DMSO             | 10                            |

**Extraction from plasma and serum**

Analytes were extracted from plasma or serum by protein precipitation in organic solvent. In a 96-well Acroprep Advance filter plate (Pall PN: 8148), 100 µL of sample, 10 µL of internal standard mix, and 300 µL acetonitrile (ACN)/1% formic acid were combined. The plate was sealed (Pall Cap Mat PN: 5230) and vigorously agitated with a multitube vortexer (10 min on maximum speed). The plate was then spun down for 10 min at 1,509xg and the filtrate collected in a new 96-well collection plate (Grainger PN: 786201). The filtrate was then passed through a phospholipid removal plate (Phenomenex PN: 8E-S133-TGB) using a positive pressure manifold (Biotage, Pressure+96). The resulting sample was captured in

a 2mL 96-well plate (Grainger PN: 4780270) and dried down in a centrifugal vacuum evaporator overnight.

### Extraction from urine

Analytes were extracted from urine by two different solid phase extractions (see **Table a** for which analytes were extracted by each solid phase). In a 96-well plate (Grainger PN: 780270), 20 µL sample, 10 µL internal standard, and 870 µL formic acid diluent were mixed and then added to either a mixed cation exchange extraction plate or a hydrophilic-lipophilic binding extraction plate (Waters MCX PN: 186000248 with 2% formic acid in water as the diluent and HLB PN: WAT058951 with 0.2% formic acid in water as the diluent). Using the positive pressure manifold (Biotage, Pressure+96), the plates were washed with 1 mL diluent and the analytes were eluted (HLB elution: 1 mL of 60% acetonitrile, 40% methanol, MCX elution: twice with 600 µL of 60% acetonitrile, 40% methanol + 5% ammonium hydroxide) into a new 96-well plate (Grainger PN: 780270). The eluent was dried down in a centrifugal vacuum overnight.

### Liquid chromatography-tandem mass spectrometry

Dried extracts were reconstituted in 80 µL of 5% acetonitrile/0.2% formic acid in water and filtered through a large-pore filter plate (Millipore, MSBVN1210) to remove particulates. A volume of 20 µL or 5 µL (for plasma/serum and urine, respectively) was injected onto a Restek PFPP chromatographic column (50 mm x 2.1 mm Pinnacle DB PFPP 1.9 µm Restek PN: 9419252), which was developed using a gradient (Shimadzu Nexera XR 20A, **Tables c and d**). The column eluate was introduced into a triple quadrupole tandem mass spectrometer (Sciex 6500, **Tables e-g**). Data was collected by a combination of scheduled (53 sec window around the retention times listed in **Tables e-g**) and unscheduled MRMs (**Tables e-g**). Endogenous peak areas (determined in Skyline, **Figures a and b**) were normalized to internal standard peak areas (peak area ratio). To reduce run-to-run variability, all peak area ratios for study samples were normalized to the average peak area ratio observed in 5 replicates of a matrix-matched single point calibrator processed in each batch and for each study sample the resulting ratio was multiplied by the concentration of each analyte in the single point calibrator. To monitor process quality, two matrix-matched quality control samples were processed in parallel in each batch.

Table c of Item S1. Chromatographic parameters.

|                                |                                    |
|--------------------------------|------------------------------------|
| <b>Mobile Phase A</b>          | Water + 0.2% Formic Acid           |
| <b>Mobile Phase B</b>          | 80% ACN/20%MeOH + 0.2% Formic acid |
| <b>Flow Rate</b>               | 0.4 mL/min                         |
| <b>Autosampler Temperature</b> | 7 °C                               |
| <b>Column Oven Temperature</b> | 40 °C                              |

Table d of Item S1. Chromatographic program.

| Time (min) | Action               |
|------------|----------------------|
| 0.00       | Divert to Waste      |
| 0.00       | 2% B                 |
| 0.25       | 2% B                 |
| 0.50       | Divert to Instrument |
| 4.85       | 25% B                |
| 4.95       | 85% B                |
| 6.25       | 85% B                |
| 6.35       | 2% B                 |
| 7.00       | Divert to Waste      |
| 10.70      | End Run              |

Table e of Item S1. Mass Spectrometric Parameters (Part 1).

| Compound            | Mass (Da) | Pos/Neg Mode | Internal Standard                                         | Internal standard in urine (if different) | Retention Time (min) | Un/scheduled |
|---------------------|-----------|--------------|-----------------------------------------------------------|-------------------------------------------|----------------------|--------------|
| 3-Hydroxy hippurate | 194.9     | Neg          | Hippuric acid ( $^2\text{H}_5$ )                          |                                           | 2.1                  | Scheduled    |
| Adipic acid         | 145.9     | Neg          | Adipic acid ( $^{13}\text{C}_6$ )                         |                                           | 1.6                  | Scheduled    |
| Cinnamoylglycine    | 205.1     | Pos          | Cinnamoylglycine ( $^2\text{H}_2$ )                       |                                           | 4.4                  | Scheduled    |
| Dimethyluric acid   | 196.1     | Neg          | Dimethyluric acid ( $^{13}\text{C}_4, ^{15}\text{N}_3$ )  |                                           | 2.1                  | Scheduled    |
| Hippurate           | 179.1     | Pos          | Hippuric acid ( $^2\text{H}_5$ )                          |                                           | 2.5                  | Scheduled    |
| Indoxyl sulfate     | 213       | Neg          | Indoxyl sulfate ( $^{13}\text{C}_6$ )                     |                                           | 1.8                  | Unscheduled  |
| Isovalerylglycine   | 159.1     | Neg          | Isovalerylglycine ( $^2\text{H}_2$ )                      |                                           | 1.7                  | Scheduled    |
| Kynurenic acid      | 189.1     | Pos          | Kynurenic acid ( $^2\text{H}_5$ )                         |                                           | 3.1                  | Unscheduled  |
| Pantothenic acid    | 219       | Pos          | Pyridoxic acid ( $^2\text{H}_3$ )                         | Kynurenic acid ( $^2\text{H}_5$ )         | 1.3                  | Scheduled    |
| p-cresol-sulfate    | 188.01    | Neg          | p-Cresol sulfate ( $^2\text{H}_7$ )                       |                                           | 2.2                  | Unscheduled  |
| Pyridoxic acid      | 183.05    | Pos          | Pyridoxic acid ( $^2\text{H}_3$ )                         |                                           | 1.6                  | Scheduled    |
| Suberic acid        | 174.1     | Pos          | None                                                      |                                           | 3.6                  | Scheduled    |
| Succinic acid       | 118       | Neg          | Succinic acid ( $^{13}\text{C}_4$ )                       |                                           | 0.6                  | Scheduled    |
| Tiglylglycine       | 157       | Neg          | Tirlylglycine ( $^{13}\text{C}_2, ^{15}\text{N}$ )        |                                           | 1.6                  | Scheduled    |
| Trimethyluric acid  | 210.1     | Pos          | Trimethyluric acid ( $^{13}\text{C}_4, ^{15}\text{N}_3$ ) |                                           | 2.6                  | Scheduled    |
| Xanthosine          | 284.2     | Pos          | Pyridoxic acid ( $^2\text{H}_3$ )                         |                                           | 1.1                  | Scheduled    |



Table f of Item S1. Mass Spectrometric Parameters (Part 2).

| Compound            | DP  | EP  | CXP | MS1    | MS1<br>(detuned in urine) | MS3                      | CE                 |
|---------------------|-----|-----|-----|--------|---------------------------|--------------------------|--------------------|
| 3-Hydroxy hippurate | -46 | -10 | -13 | 193.9  |                           | 149.9, 92.9              | -19, -23           |
| Adipic acid         | -36 | -10 | -13 | 144.9  |                           | 126.8, 83                | -13, -16           |
| Cinnamoylglycine    | 30  | 10  | 13  | 206.1  |                           | 131.2, 103               | 16, 37             |
| Dimethyluric acid   | -45 | -10 | -13 | 195.1  |                           | 180, 109.7, 136.9        | -24, -29, -34      |
| Hippurate           | 14  | 10  | 13  | 180.1  | 181.1                     | 105, 51.1, 77, 50        | 19, 77, 43, 115    |
| Indoxyl sulfate     | -31 | -10 | -13 | 212    |                           | 132, 79.9, 80.8, 77      | -26, -24, -21, -43 |
| Isovalerylglycine   | -25 | -10 | -13 | 158.1  |                           | 113.9, 73.9              | -17, -19           |
| Kynurenic acid      | 42  | 10  | 13  | 190.1  | 191.1                     | 144.1, 89, 116.1         | 26, 52, 42         |
| Pantothenic acid    | 51  | 10  | 13  | 220    |                           | 202.1, 124.1, 184.1, 90  | 28, 16, 20, 18     |
| p-cresol-sulfate    | -29 | -10 | -13 | 188.01 | 188.01                    | 107, 79.9, 104.9, 77     | -28, -21, -44, -45 |
| Pyridoxic acid      | 31  | 10  | 13  | 184.05 |                           | 166.1, 92.1, 148.1, 65.2 | 17, 38, 28, 43     |
| Suberic acid        | 30  | 10  | 13  | 175.1  |                           | 157.2, 83.1, 111.1, 55   | 11, 15, 23, 33     |
| Succinic acid       | -21 | -10 | -13 | 117    |                           | 98.9                     | -16                |
| Tiglylglycine       | -22 | -10 | -13 | 156    |                           | 111.9, 95.8, 109.9       | -16, -21, -18      |
| Trimethyluric acid  | 94  | 10  | 13  | 211.1  |                           | 196.1, 126, 154          | 31, 25, 25         |
| Xanthosine          | 38  | 10  | 13  | 285.2  |                           | 153.1, 133, 136.1        | 15, 15, 45         |

Table g of Item S1. Mass Spectrometric Parameters (Part 3).

| Internal Standard                                         | Retention Time (min) | DP  | EP  | CXP | MS1   | MS3                    | CE                 |
|-----------------------------------------------------------|----------------------|-----|-----|-----|-------|------------------------|--------------------|
| Adipic acid ( $^{13}\text{C}_6$ )                         | 1.6                  | -24 | -10 | -13 | 151   | 133, 106.1, 88, 86.1   | -17, -14, -18, -26 |
| Cinnamoylglycine ( $^2\text{H}_2$ )                       | 4.4                  | 40  | 10  | 13  | 208.1 | 131.1, 103, 77.1, 51.1 | 17, 39, 58, 87     |
| Dimethyluric acid ( $^{13}\text{C}_4, ^{15}\text{N}_3$ )  | 2.1                  | -62 | -10 | -13 | 201.1 | 186, 141.1, 112.9      | -25, -34, -30      |
| Hippuric acid ( $^2\text{H}_5$ )                          | 2.4                  | 26  | 10  | 13  | 185.1 | 110.2, 82.1, 54.1      | 19, 43, 73         |
| Indoxyl sulfate ( $^{13}\text{C}_6$ )                     | 1.8                  | -30 | -10 | -13 | 218   | 138, 110, 83.1, 80.9   | -27, -33, -41, -21 |
| Isovaleryl glycine ( $^2\text{H}_2$ )                     | 1.7                  | -20 | -10 | -13 | 160.1 | 116.1, 100.1, 76       | -18, -25, -17      |
| Kynurenic acid ( $^2\text{H}_5$ )                         | 3.1                  | 38  | 10  | 13  | 195.1 | 149.2, 121.1, 94.1     | 28, 43, 53         |
| p-Cresol sulfate ( $^2\text{H}_7$ )                       | 2.1                  | -30 | -10 | -13 | 194.1 | 114, 112.1, 110, 79.9  | -28, -47, -50, -24 |
| Pyridoxic acid ( $^2\text{H}_3$ )                         | 1.6                  | 34  | 10  | 13  | 187.2 | 150.1, 141.1, 94, 67   | 30, 31, 40, 45     |
| Succinic acid ( $^{13}\text{C}_4$ )                       | 0.6                  | -15 | -10 | -13 | 120.9 | 103, 76.1, 57.9        | -15, -16, -19      |
| Tirlylglycine ( $^{13}\text{C}_2, ^{15}\text{N}$ )        | 1.6                  | -18 | -10 | -13 | 159.1 | 114, 112, 98, 77       | -16, -18, -21, -15 |
| Trimethyluric acid ( $^{13}\text{C}_4, ^{15}\text{N}_3$ ) | 2.6                  | 18  | 10  | 13  | 218.2 | 203.2, 130.1           | 28, 28             |

#### Assignment of single point calibrator concentrations using quantitative NMR and standard addition

**Quantitative NMR.** Non-isotopically labeled analytes were dissolved in  $\text{D}_2\text{O}$  (p-cresol sulfate) or  $d_6$ -DMSO (all others) and analyzed by proton ( $^1\text{H}$ ) NMR on a AV-300 (Bruker). The instrument was calibrated against a Bruker certified pamoic acid standard (100 mg/ml pamoic acid in  $d_6$ -DMSO + 1% TMS, Part no. Z10298). Samples were auto-tuned and matched and shimmed with a software script to ensure consistent measurement conditions.  $^1\text{H}$  NMR peaks of pamoic acid that were integrated and assigned to stoichiometric counts of  $^1\text{H}$  are shown in **Table h**.

Table h of Item S1. Pamoic acid internal NMR standard integrals and assignments.

| Proton chemical shift range | Integrated Area | Number of protons |
|-----------------------------|-----------------|-------------------|
| <b>8.698 to 8.344</b>       | 2.0             | 2                 |
| <b>8.344 to 8.002</b>       | 2.044           | 2                 |
| <b>8.002 to 7.741</b>       | 1.9882          | 2                 |
| <b>7.493 to 7.110</b>       | 3.9668          | 4                 |

<sup>1</sup>H NMR data were collected under identical conditions. Clean peaks that did not exhibit overlap with adjacent peaks and that did not have interference from solvent and other buffer peaks were chosen for assignment. These peaks were unambiguously assigned to respective <sup>1</sup>H atoms of the molecule using established protocol of small molecule resonance assignment by multiplet and chemical shift analysis as well as ab-initio simulation of <sup>1</sup>H spectra from the known structures of the molecules. Both the above steps were carried out using Topspin 3.5 (Bruker) and MestReNova 12.0.1 (Mestrelab Research S.L.) software. The integrated areas of the assigned peaks were then computed and compared with the pamoic acid standard integrals as internal references and the effective concentration was determined using the ERETIC2 protocol from within the Topspin 3.5 software [PMID: 25215441]. Cinnamoylglycine required the higher resolution of an AV700 system. The same stocks measured by NMR were then spiked into the plasma and urine single point calibrators and used by standard addition to assign the concentration of each analyte in the single point calibrators.

**Standard addition:** Concentration of analytes was initially estimated by comparing peak areas of internal standards of known concentration, to peak areas of unknown endogenous analytes. Each matrix-matched single point calibrator (**SPC**) was spiked with 3% (serum) or 5% (urine) analyte stock solution (in DMSO) to a final concentration of approximately 30-fold (serum) or 10-fold (urine) higher than the estimated concentration of endogenous analyte in each SPC. Analyte mixes and spiked SPC were prepared in singlicate and extracted in triplicate on three independent days. Endogenous analyte concentration was calculated by multiplying the peak area ratio of the SPC (with 3% or 5% blank DMSO for serum or urine, respectively) by the slope of the linear regression of concentration vs. peak area ratio (2-4 data points for each curve, spanning the linear portion of the spike-recovery experiment).

#### Limits of quantification and linearity

Upper limit of quantification (**ULOQ**) was defined as the highest concentration in the standard addition experiment that demonstrated a linear response across the three days. Lower limit of quantitation (**LLOQ**) was determined by diluting single point calibrator into negative matrix and extracting in triplicate. LLOQ was determined to be the lowest concentration at which the recovery was between 80-120% and the within-day CV% of the measurement was <20%. Plasma samples were diluted into either MSG3000 (Golden West Diagnostics), 30% bovine serum albumin (Sigma) in phosphate buffered saline, or saline [data shown is for the most relevant matrix that lacked isobaric interference]. Urine samples were diluted into water.

Table i of Item S1. Limits of quantification for each analyte.

| Compound (endogenous)            | Serum LLOQ (ng/mL) | Urine LLOQ (ng/mL) | Serum ULOQ | Average $r^2$ (serum) <sup>d</sup> | Urine ULOQ | Average $r^2$ (urine) <sup>d</sup> |
|----------------------------------|--------------------|--------------------|------------|------------------------------------|------------|------------------------------------|
| 3-Hydroxy hippurate <sup>a</sup> | 0.96               | 116                | 415        | 0.9892                             | 284639     | 0.9951                             |
| Adipic acid <sup>a</sup>         | ND                 | 730                | 3428       | 0.9898                             | 29056      | 0.9899                             |
| Cinnamoylglycine <sup>a</sup>    | 0.22               | 0.67               | 156        | 0.9905                             | 1088       | 0.9958                             |
| Dimethyluric acid <sup>a</sup>   | 0.23               | 26                 | 336        | 0.9945                             | 144413     | 0.9887                             |
| Hippurate <sup>a</sup>           | 9.5                | 380                | 2559       | 0.9844                             | 1169664    | 0.9938                             |
| Indoxyl sulfate <sup>a</sup>     | 9.1                | 330                | 10517      | 0.9897                             | 969097     | 0.9913                             |
| Isovalerylglycine <sup>b</sup>   | 0.55               | 16                 | 75         | 0.9967                             | 20049      | 0.9849                             |
| Kynurenic acid <sup>a</sup>      | 0.70               | 6.7                | 309        | 0.9986                             | 124985     | 0.9938                             |
| Pantothenic acid <sup>a</sup>    | 6.3                | 114                | 2191       | 0.9976                             | 13288      | 0.9842                             |
| p-cresol-sulfate <sup>a</sup>    | 29                 | 49                 | 38217      | 0.9896                             | 104148     | 0.8875                             |
| Pyridoxic acid <sup>a</sup>      | 1.5                | 21                 | 480        | 0.9951                             | 50291      | 0.9359                             |
| Suberic acid <sup>a</sup>        | ND                 | 631                | 3172       | 0.9798                             | 55909      | 0.9807                             |
| Succinic acid <sup>a</sup>       | ND                 | 2397               | 107158     | 0.9988                             | 22247      | 0.9521                             |
| Tiglylglycine <sup>c</sup>       | 0.55               | 15                 | 169        | 0.9984                             | 58664      | 0.9980                             |
| Trimethyluric acid <sup>a</sup>  | 0.22               | 8.0                | 123        | 0.9979                             | 18647      | 0.9791                             |
| Xanthosine <sup>a</sup>          | 0.31               | 2.4                | 329        | 0.9975                             | 5009       | 0.9783                             |

<sup>a</sup> Plasma diluted with MSG3000.

<sup>b</sup> Plasma diluted with 30% bovine serum albumin.

<sup>c</sup> Plasma diluted with saline.

<sup>d</sup> Pearson correlation coefficient of the standard addition experiment in each single point calibrator.

ND: Not determined due to isobaric interference in dilution matrices.

### Interference

SPC, hemolyzed, lipemic, high-protein (7 g/dL), and low-protein samples (<3 g/dL) were each spiked to a final concentration 3-fold higher than the approximate endogenous concentration of each analyte and percent recoveries were calculated (SPC was assumed to be 100% recovery for each). Interference was defined by a recovery outside the range of 75-125% of expected. Hemolysis interfered with trimethyluric acid recovery. High total protein interfered with the recovery of 3-hydroxy hippurate and isovalerylglycine. Lipemia and low total protein did not interfere with any

analyte recoveries.

Table j of Item S1. Recoveries in different matrices.

|                            | Lipemic | Hemolysis | Low total protein | High total protein |
|----------------------------|---------|-----------|-------------------|--------------------|
| <b>3-Hydroxy hippurate</b> | 116%    | 102%      | 93%               | 72%                |
| <b>Adipic acid</b>         | 96%     | 124%      | 102%              | 119%               |
| <b>Cinnamoylglycine</b>    | 112%    | 118%      | 112%              | 118%               |
| <b>Dimethyluric acid</b>   | 104%    | 108%      | 109%              | 101%               |
| <b>Hippurate</b>           | 116%    | 117%      | 104%              | 98%                |
| <b>Indoxyl sulfate</b>     | 109%    | 118%      | 106%              | 94%                |
| <b>Isovalerylglycine</b>   | 111%    | 123%      | 114%              | 130%               |
| <b>Kynurenic acid</b>      | 112%    | 122%      | 109%              | 117%               |
| <b>Pantothenic acid</b>    | 106%    | 112%      | 108%              | 126%               |
| <b>p-cresol-sulfate</b>    | 109%    | 114%      | 104%              | 94%                |
| <b>Pyridoxic acid</b>      | 108%    | 112%      | 106%              | 116%               |
| <b>Suberic acid</b>        | 98%     | 117%      | 110%              | 96%                |
| <b>Succinic acid</b>       | 109%    | 116%      | 108%              | 123%               |
| <b>Tiglylglycine</b>       | 111%    | 118%      | 115%              | 124%               |
| <b>Trimethyluric acid</b>  | 88%     | 55%       | 92%               | 108%               |
| <b>Xanthosine</b>          | 99%     | 120%      | 113%              | 100%               |

Figure a of Item S1. Example chromatograms (from serum single point calibrator).

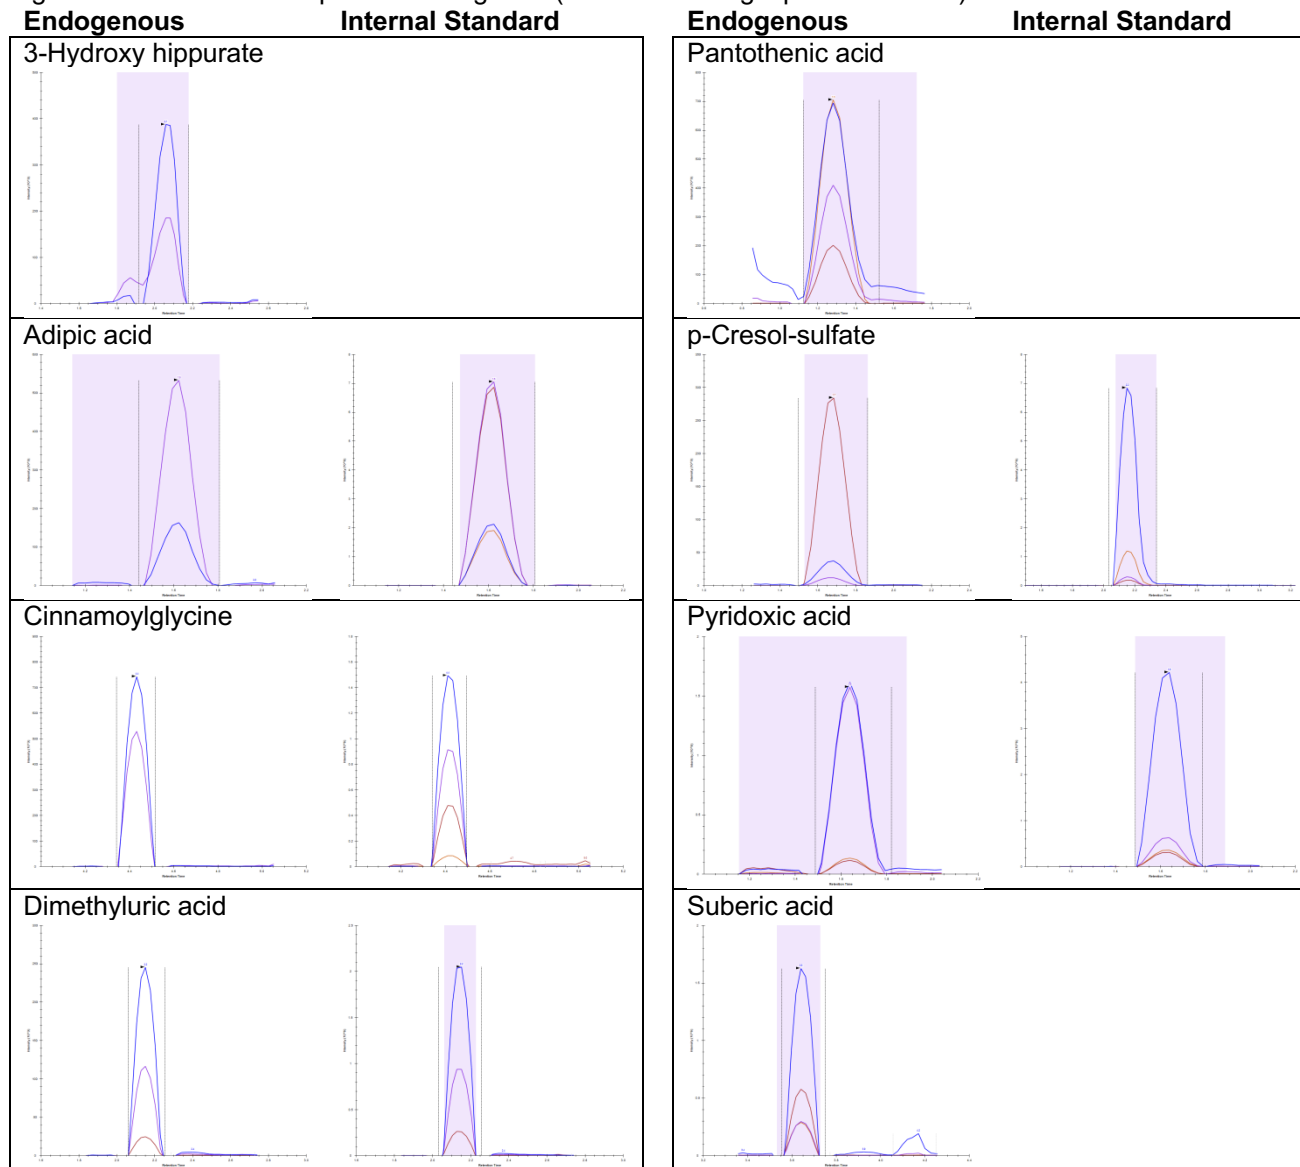

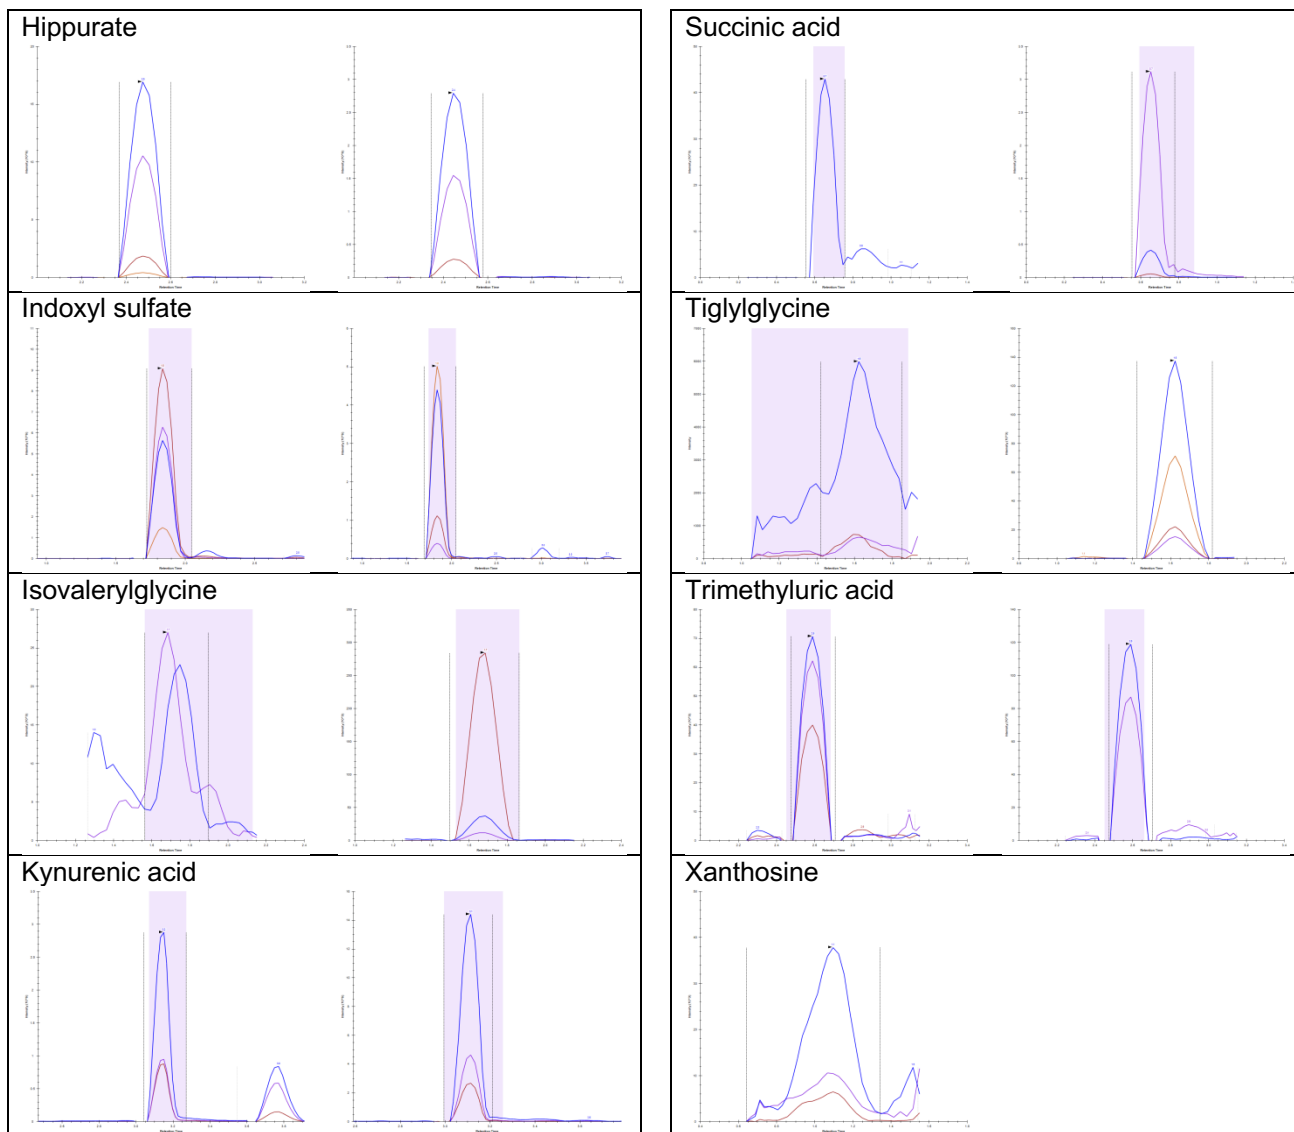

Figure b of Item S1. Example chromatograms (from urine single point calibrator).

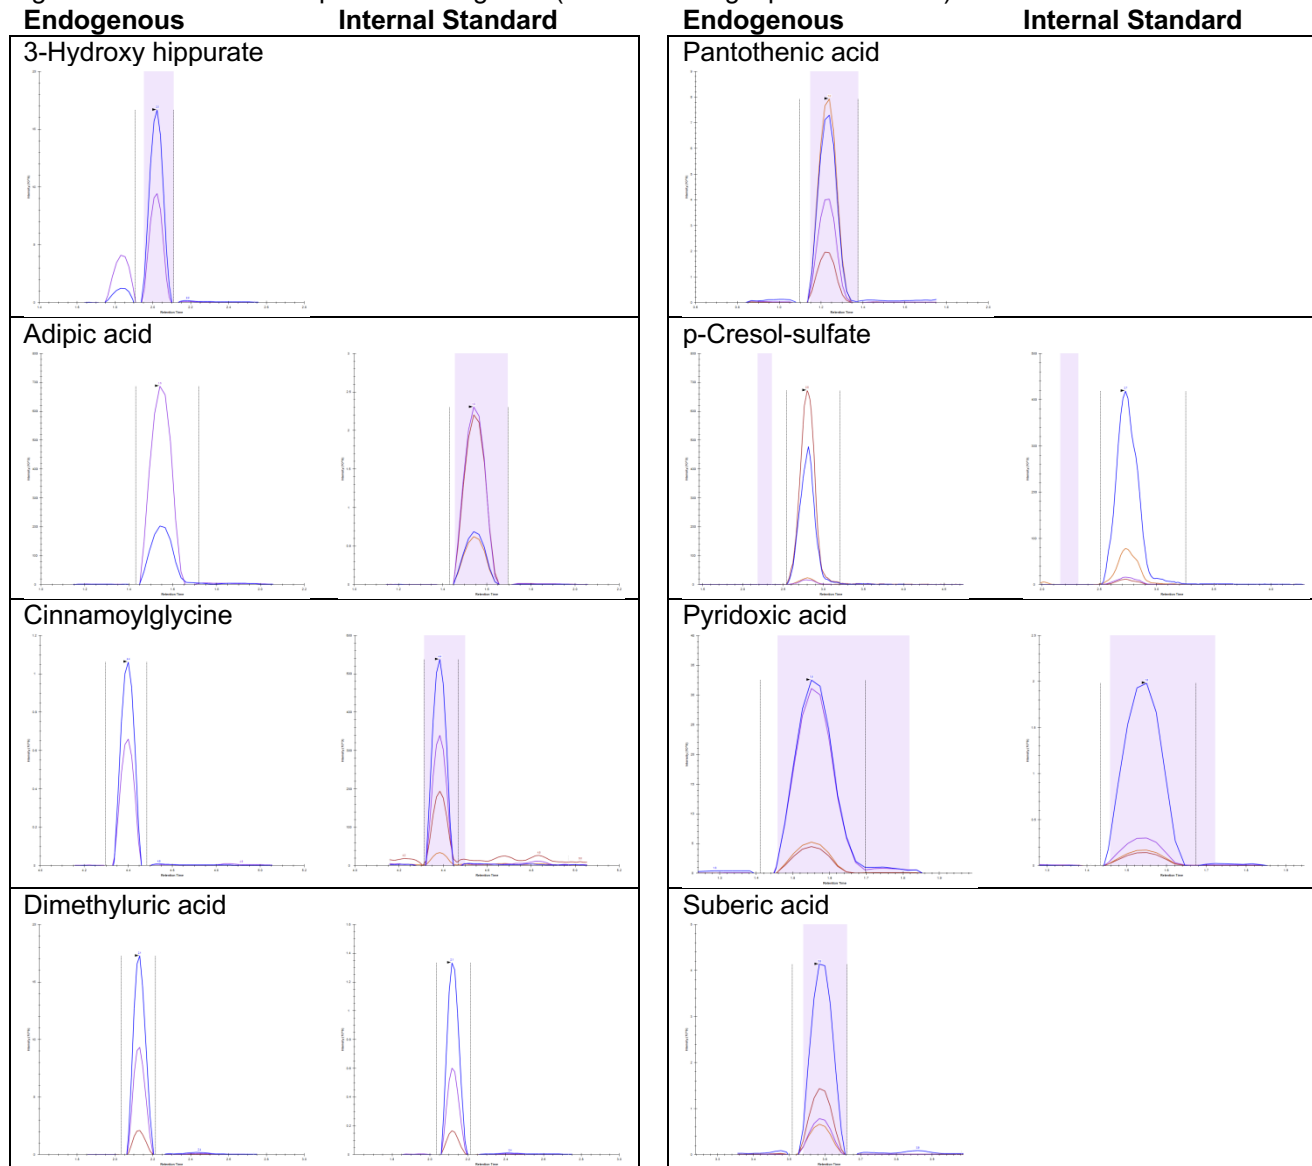



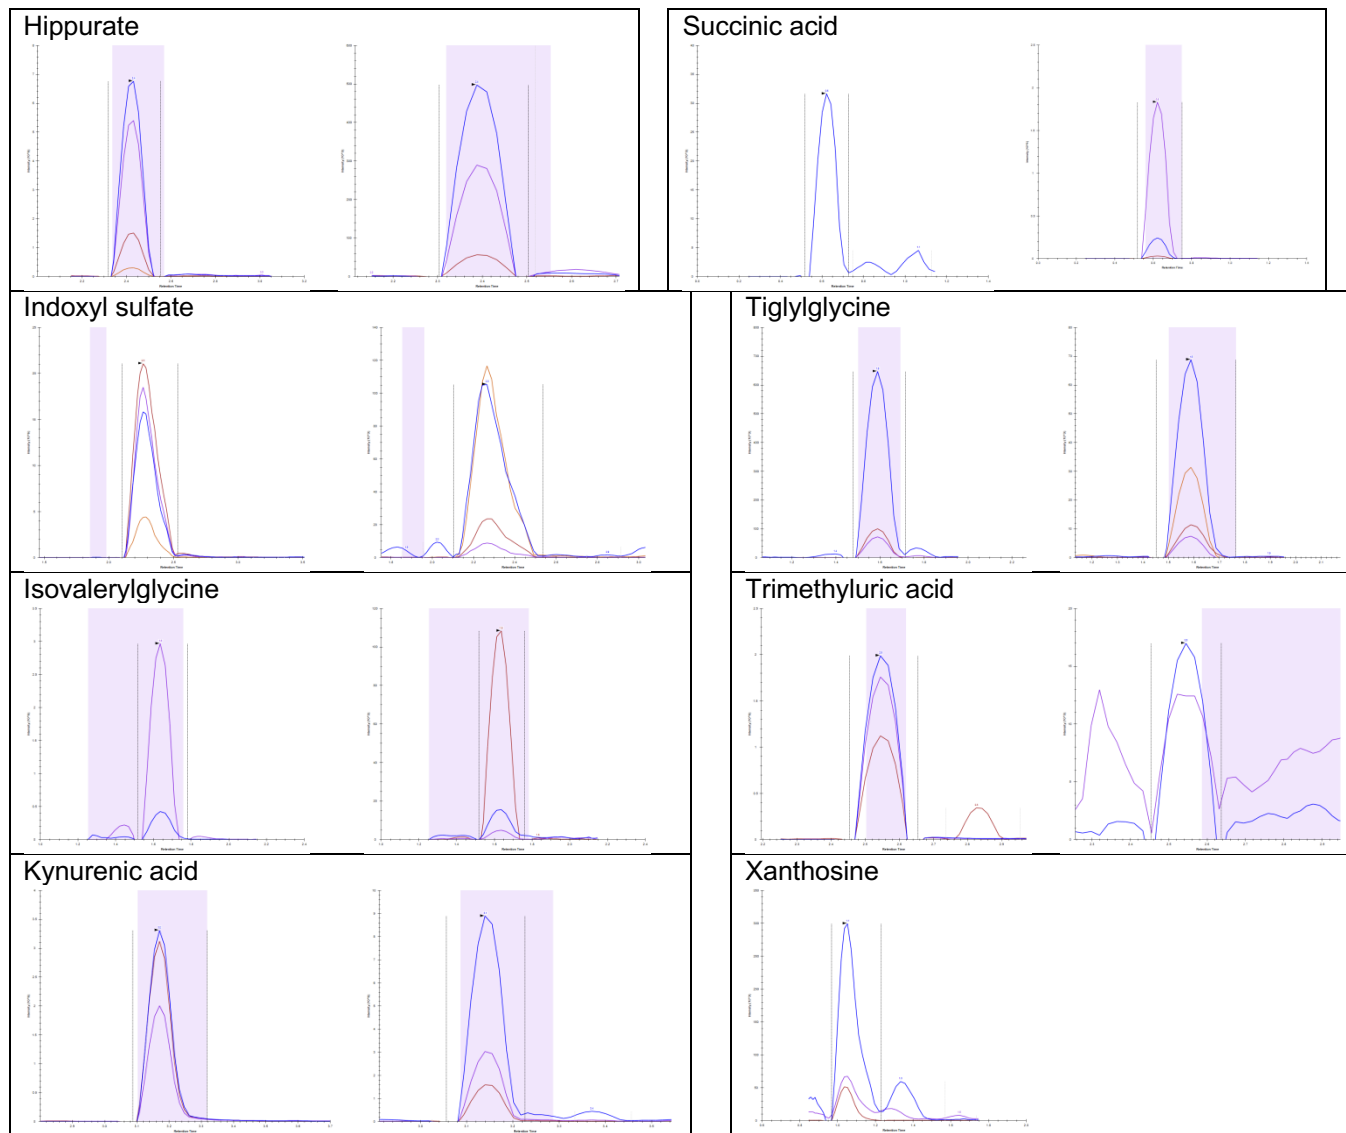

**Table S1. Variability of secretory solutes and their respective urinary clearances.**

| Solute            | Diurnal coefficient of variation in plasma concentration over 24-hours <sup>a</sup> , %<br>(N = 46) | Visit-to-visit coefficient of variation in plasma concentration <sup>b</sup> , %<br>(N = 27) | Visit-to-visit coefficient of variation in 24-hour urinary clearance <sup>b,c</sup> , %<br>(N = 23) |
|-------------------|-----------------------------------------------------------------------------------------------------|----------------------------------------------------------------------------------------------|-----------------------------------------------------------------------------------------------------|
| Cinnamoylglycine  | 42.9                                                                                                | 36.3                                                                                         | 32.9                                                                                                |
| Indoxyl sulfate   | 20.9                                                                                                | 24.1                                                                                         | 20.8                                                                                                |
| Isovalerylglycine | 26.9                                                                                                | 24.6                                                                                         | 23.7                                                                                                |
| Kynurenic acid    | 17.5                                                                                                | 18.2                                                                                         | 41.0                                                                                                |
| P-cresol sulfate  | 20.2                                                                                                | 36.5                                                                                         | 21.8                                                                                                |
| Pyridoxic acid    | 26.7                                                                                                | 31.9                                                                                         | 23.2                                                                                                |
| Tiglylglycine     | 29.3                                                                                                | 22.7                                                                                         | 24.1                                                                                                |
| Xanthosine        | 26.9                                                                                                | 15.8                                                                                         | 18.1                                                                                                |
| Summary clearance | -                                                                                                   | -                                                                                            | 6.7                                                                                                 |

<sup>a</sup> Diurnal variation determined from five serial plasma measurements at 0, 1, 3-5, 8, and 24 hours.

<sup>b</sup> Visit-to-visit variation determined from measurements at two study visits median 65 days apart (IQR 44 -84 days).

<sup>c</sup> Visit-to-visit variation in urinary clearances based on time-averaged plasma concentrations at each visit.

**Table S2. Kidney clearances and protein binding of secretory solutes.<sup>a</sup>**

|                   | Median kidney clearance<br>(mL/min, IQR) | Correlation<br>with eGFR <sup>b</sup> | Protein binding in<br>healthy individuals, % <sup>c</sup> | Protein binding in non-dialyzed<br>patients with estimated GFR <20<br>mL/min/1.73m <sup>2</sup> , % <sup>c</sup> |
|-------------------|------------------------------------------|---------------------------------------|-----------------------------------------------------------|------------------------------------------------------------------------------------------------------------------|
| Pyridoxic acid    | 456 (282, 715)                           | 0.57                                  | 83 ± 4                                                    | 87 ± 1                                                                                                           |
| Isovalerylglycine | 225 (142, 348)                           | 0.50                                  | 6 ± 13                                                    | 4 ± 7                                                                                                            |
| Tiglylglycine     | 182 (111, 286)                           | 0.56                                  | 33 ± 20                                                   | 24 ± 15                                                                                                          |
| Kynurenic acid    | 92 (63, 136)                             | 0.61                                  | 97 ± 1                                                    | 96 ± 2                                                                                                           |
| Xanthosine        | 77 (46, 121)                             | 0.44                                  | 11 ± 14                                                   | 15 ± 13                                                                                                          |
| Cinnamoylglycine  | 57 (33, 101)                             | 0.40                                  | 91 ± 12                                                   | 95 ± 3                                                                                                           |
| Indoxyl sulfate   | 34 (22, 51)                              | 0.56                                  | 97 ± 1                                                    | 93 ± 2                                                                                                           |
| p-cresol sulfate  | 10 (6, 15)                               | 0.52                                  | 97 ± 1                                                    | 96 ± 2                                                                                                           |

<sup>a</sup> IQR: inter-quartile range; eGFR: estimated GFR.

<sup>b</sup> Pearson correlations between log-transformed secretory solute clearances and log-transformed eGFR, each standardized to 1.73 m<sup>2</sup> body surface area.

<sup>c</sup> Plasma filtration experiments performed in 14 healthy individuals with normal kidney function and 14 patients with advanced chronic kidney disease not receiving dialysis. Plasma was filtered using a centrifugal filter (Amicon Ultra, 3kD MWCO) at 11,200xg for 30 minutes at room temperature. Preliminary experiments were performed to confirm that observed differences between the filtrate and unfiltered plasma could not be attributed to adsorption to the Amicon Ultra filtration units.

**Table S3. Associations between secretory solute clearances and subdistribution hazard ratio of cardiovascular events <sup>a, b</sup>**

|                   | Heart failure   |           |         | Myocardial infarction |           |                   | Stroke |           |         |
|-------------------|-----------------|-----------|---------|-----------------------|-----------|-------------------|--------|-----------|---------|
|                   | HR <sup>c</sup> | 95% CI    | P-value | HR                    | 95% CI    | P-value           | HR     | 95% CI    | P-value |
| Pyridoxic acid    | 1.06            | 0.94-1.19 | 0.4     | 1.00                  | 0.88-1.14 | 0.9               | 1.14   | 0.91-1.42 | 0.3     |
| Isovalerylglycine | 1.09            | 0.97-1.23 | 0.1     | 1.00                  | 0.86-1.15 | 0.9               | 1.02   | 0.84-1.24 | 0.8     |
| Tiglylglycine     | 1.08            | 0.96-1.21 | 0.2     | 1.02                  | 0.89-1.17 | 0.8               | 1.01   | 0.83-1.22 | 0.9     |
| Kynurenic acid    | 1.01            | 0.87-1.17 | 0.9     | 0.99                  | 0.83-1.17 | 0.9               | 0.90   | 0.68-1.18 | 0.4     |
| Xanthosine        | 1.06            | 0.97-1.15 | 0.2     | 1.09                  | 1.00-1.19 | 0.04 <sup>d</sup> | 0.97   | 0.83-1.13 | 0.7     |
| Cinnamoylglycine  | 1.01            | 0.92-1.09 | 0.9     | 0.94                  | 0.85-1.04 | 0.2               | 0.97   | 0.84-1.11 | 0.6     |
| Indoxyl sulfate   | 1.04            | 0.91-1.19 | 0.5     | 0.86                  | 0.73-1.01 | 0.07              | 0.77   | 0.58-1.01 | 0.06    |
| p-cresol sulfate  | 0.97            | 0.88-1.08 | 0.6     | 0.94                  | 0.83-1.08 | 0.4               | 0.88   | 0.73-1.08 | 0.2     |
| Summary score     | 1.05            | 0.89-1.25 | 0.6     | 1.00                  | 0.81-1.25 | 0.9               | 0.90   | 0.64-1.26 | 0.5     |

<sup>a</sup> Results from subdistribution proportional hazard regression with death as the competing event.

<sup>b</sup> Model adjusted for age, race, sex, clinical sites, educational attainment, smoking status, history of cardiovascular disease, diabetes, body mass index, systolic blood pressure, triglyceride, 24-hour urinary albumin excretion, ACEi/ARB, loop diuretics, beta blockers, and estimated GFR.

<sup>c</sup> Subdistribution hazard ratio expressed per 50% lower secretory solute clearance or per 10 units lower summary secretion score

<sup>d</sup> Not statistically significant after correction for multiple comparisons using the Hommel method.

**Table S4. Associations between secretory solute clearances and all heart failure events (incident and recurrent) <sup>a, b, c, d</sup>**

|                   | Model 1          |           |          | Model 2 |           |          | Model 3 |           |         |
|-------------------|------------------|-----------|----------|---------|-----------|----------|---------|-----------|---------|
|                   | IRR <sup>c</sup> | 95% CI    | P-value  | IRR     | 95% CI    | P-value  | IRR     | 95% CI    | P-value |
| Pyridoxic acid    | 1.36             | 1.26-1.47 | < 0.001* | 1.19    | 1.08-1.32 | < 0.001* | 1.10    | 0.96-1.24 | 0.2     |
| Isovalerylglycine | 1.32             | 1.19-1.46 | < 0.001* | 1.08    | 0.95-1.21 | 0.2      | 0.99    | 0.86-1.13 | 0.9     |
| Tiglylglycine     | 1.34             | 1.23-1.46 | < 0.001* | 1.16    | 1.05-1.28 | 0.004*   | 1.07    | 0.95-1.20 | 0.3     |
| Kynurenic acid    | 1.43             | 1.28-1.60 | < 0.001* | 1.18    | 1.04-1.35 | 0.01     | 1.04    | 0.89-1.21 | 0.6     |
| Xanthosine        | 1.22             | 1.13-1.33 | < 0.001* | 1.10    | 1.02-1.19 | 0.01     | 1.05    | 0.96-1.13 | 0.3     |
| Cinnamoylglycine  | 1.16             | 1.07-1.25 | < 0.001* | 1.09    | 1.01-1.18 | 0.03     | 1.04    | 0.95-1.14 | 0.4     |
| Indoxyl sulfate   | 1.33             | 1.21-1.46 | < 0.001* | 1.10    | 0.98-1.23 | 0.1      | 0.95    | 0.83-1.09 | 0.5     |
| p-cresol sulfate  | 1.23             | 1.14-1.34 | < 0.001* | 1.07    | 0.96-1.19 | 0.2      | 0.95    | 0.85-1.08 | 0.4     |
| Summary score     | 1.60             | 1.43-1.79 | < 0.001* | 1.25    | 1.09-1.44 | < 0.001* | 1.07    | 0.90-1.28 | 0.4     |

<sup>a</sup> Results from Poisson regression.

<sup>b</sup> Model 1 adjusted for age, race, and sex. Model 2 additionally adjusted for clinical sites, educational attainment, smoking status, history of cardiovascular disease, diabetes, body mass index, systolic blood pressure, triglyceride, 24-hour urinary albumin excretion, ACEi/ARB, loop diuretics, and beta blockers. Model 3 additionally adjusted for estimated GFR.

<sup>c</sup> Overall event rate: 5.8 events per 100 person-years (95% CI: 5.3 – 6.5).

<sup>d</sup> \* denotes statistical significance after correction for multiple comparisons using the Hommel method.

<sup>e</sup> Event rate ratio expressed per 50% lower secretory solute clearance or per 10 units lower summary secretion score

**Table S5. Associations of secretory solute clearances with ischemic stroke and hemorrhagic stroke <sup>a,b</sup>**

|                   | Ischemic stroke <sup>c</sup> |           |                    | Hemorrhagic stroke <sup>d</sup> |           |         |
|-------------------|------------------------------|-----------|--------------------|---------------------------------|-----------|---------|
|                   | HR <sup>e</sup>              | 95% CI    | P-value            | HR                              | 95% CI    | P-value |
| Pyridoxic acid    | 1.18                         | 0.91-1.53 | 0.2                | 1.08                            | 0.67-1.75 | 0.7     |
| Isovalerylglycine | 1.06                         | 0.82-1.36 | 0.7                | 0.84                            | 0.52-1.37 | 0.5     |
| Tiglylglycine     | 0.94                         | 0.73-1.22 | 0.7                | 1.15                            | 0.72-1.84 | 0.6     |
| Kynurenic acid    | 0.84                         | 0.60-1.18 | 0.3                | 0.80                            | 0.42-1.53 | 0.5     |
| Xanthosine        | 0.93                         | 0.77-1.14 | 0.5                | 1.08                            | 0.75-1.56 | 0.7     |
| Cinnamoylglycine  | 0.96                         | 0.80-1.14 | 0.6                | 0.99                            | 0.71-1.36 | 0.9     |
| Indoxyl sulfate   | 0.67                         | 0.49-0.90 | 0.009 <sup>f</sup> | 0.88                            | 0.50-1.54 | 0.7     |
| p-cresol sulfate  | 0.83                         | 0.65-1.06 | 0.1                | 0.88                            | 0.56-1.37 | 0.6     |
| Summary score     | 0.84                         | 0.56-1.28 | 0.4                | 0.95                            | 0.43-2.09 | 0.9     |

<sup>a</sup> Results from Cox proportional hazard regression.

<sup>b</sup> Model adjusted for age, race, sex, clinical sites, educational attainment, smoking status, history of cardiovascular disease, diabetes, body mass index, systolic blood pressure, triglyceride, 24-hour urinary albumin excretion, ACEi/ARB, loop diuretics, and beta blockers, and estimated GFR.

<sup>c</sup> Incidence rate of ischemic stroke: 0.4 events per 100 person-years (95% CI: 0.3 – 0.5). Median follow up time: 8.2 years.

<sup>d</sup> Incidence rate of hemorrhagic stroke: 0.10 events per 100 person-years (95% CI: 0.07 – 0.15). Median follow up time: 9.4 years.

<sup>e</sup> Hazard ratio expressed per 50% lower secretory solute clearance or per 10 units lower summary secretion score

<sup>f</sup> Not statistically significant after correction for multiple comparisons using the Hommel method.

**Table S6. Associations of plasma concentrations of secretory solutes with incident heart failure, myocardial infarction, and stroke<sup>a, b, c</sup>**

|                   | Heart failure   |           |         |         |           |         | Myocardial infarction |           |         |         |           |         | Stroke  |           |         |         |           |         |
|-------------------|-----------------|-----------|---------|---------|-----------|---------|-----------------------|-----------|---------|---------|-----------|---------|---------|-----------|---------|---------|-----------|---------|
|                   | Model 2         |           |         | Model 3 |           |         | Model 2               |           |         | Model 3 |           |         | Model 2 |           |         | Model 3 |           |         |
|                   | HR <sup>d</sup> | 95% CI    | P-value | HR      | 95% CI    | P-value | HR                    | 95% CI    | P-value | HR      | 95% CI    | P-value | HR      | 95% CI    | P-value | HR      | 95% CI    | P-value |
| Pyridoxic acid    | 1.11            | 1.04-1.19 | 0.002*  | 1.07    | 1.00-1.15 | 0.06    | 1.07                  | 0.99-1.16 | 0.1     | 1.04    | 0.96-1.13 | 0.4     | 1.03    | 0.90-1.18 | 0.6     | 1.02    | 0.88-1.17 | 0.8     |
| Isovalerylglycine | 1.18            | 1.04-1.34 | 0.01    | 1.05    | 0.92-1.21 | 0.5     | 1.19                  | 1.01-1.39 | 0.04    | 1.09    | 0.92-1.29 | 0.3     | 0.94    | 0.74-1.21 | 0.7     | 0.89    | 0.68-1.17 | 0.4     |
| Tiglylglycine     | 1.15            | 1.03-1.28 | 0.01*   | 1.03    | 0.92-1.16 | 0.6     | 1.17                  | 1.03-1.34 | 0.02    | 1.09    | 0.95-1.26 | 0.2     | 1.07    | 0.88-1.30 | 0.5     | 1.04    | 0.84-1.29 | 0.7     |
| Kynurenic acid    | 1.17            | 1.02-1.34 | 0.02    | 0.95    | 0.80-1.11 | 0.5     | 1.12                  | 0.96-1.32 | 0.2     | 0.96    | 0.80-1.17 | 0.7     | 0.84    | 0.64-1.09 | 0.2     | 0.71    | 0.52-0.97 | 0.03    |
| Xanthosine        | 1.10            | 1.03-1.18 | 0.006*  | 1.07    | 0.99-1.15 | 0.08    | 1.10                  | 1.02-1.19 | 0.01*   | 1.08    | 1.00-1.17 | 0.06    | 0.99    | 0.86-1.14 | 0.9     | 0.98    | 0.85-1.13 | 0.8     |
| Cinnamoylglycine  | 1.04            | 0.98-1.10 | 0.2     | 1.00    | 0.94-1.06 | 0.9     | 1.00                  | 0.93-1.07 | 0.9     | 0.97    | 0.91-1.04 | 0.5     | 1.04    | 0.93-1.15 | 0.5     | 1.03    | 0.93-1.15 | 0.6     |
| Indoxyl sulfate   | 1.04            | 0.93-1.16 | 0.5     | 0.91    | 0.82-1.02 | 0.1     | 0.98                  | 0.86-1.12 | 0.8     | 0.89    | 0.78-1.02 | 0.09    | 1.05    | 0.86-1.28 | 0.6     | 1.02    | 0.83-1.26 | 0.8     |
| p-cresol sulfate  | 1.08            | 1.00-1.17 | 0.04    | 1.02    | 0.94-1.10 | 0.7     | 1.10                  | 1.01-1.20 | 0.03    | 1.06    | 0.97-1.16 | 0.2     | 1.11    | 0.97-1.27 | 0.1     | 1.10    | 0.95-1.27 | 0.2     |

<sup>a</sup> Results from Cox proportional hazard regression.

<sup>b</sup> Model 2 adjusted for age, race, sex, clinical sites, educational attainment, smoking status, history of cardiovascular disease, diabetes, body mass index, systolic blood pressure, triglyceride, 24-hour urinary albumin excretion, ACEi/ARB, loop diuretics, and beta blockers. Model 3 additionally adjusted for estimated GFR.

<sup>c</sup> \* denotes statistical significance after correction for multiple comparisons using the Hommel method.

<sup>d</sup> Hazard ratio expressed per 50% higher secretory solute plasma concentration.

**Table S7. Associations of model covariates with incident heart failure, myocardial infarction, and stroke<sup>a,b</sup>**

|                              | Incident heart failure |         | Incident myocardial infarction |         | Incident stroke |         |
|------------------------------|------------------------|---------|--------------------------------|---------|-----------------|---------|
|                              | Hazard ratio           | P-value | Hazard ratio                   | P-value | Hazard ratio    | P-value |
| Age, years                   | 1.03                   | < 0.001 | 1.03                           | < 0.001 | 1.04            | 0.002   |
| Female                       | 0.92                   | 0.4     | 0.78                           | 0.04    | 1.00            | 0.9     |
| Black                        | 1.01                   | 0.9     | 1.05                           | 0.7     | 1.12            | 0.6     |
| Hispanic                     | 1.03                   | 0.9     | 1.27                           | 0.4     | 2.43            | 0.01    |
| Body mass index*             | 1.02                   | 0.002   | 0.99                           | 0.2     | 0.98            | 0.2     |
| Education categories         |                        |         |                                |         |                 |         |
| Less than high school        | Ref.                   | /       | Ref.                           | /       | Ref.            | /       |
| High school graduate         | 0.76                   | 0.06    | 1.13                           | 0.5     | 0.93            | 0.8     |
| Some college                 | 0.64                   | 0.001   | 0.93                           | 0.7     | 1.00            | 0.9     |
| College graduate or higher   | 0.60                   | 0.001   | 0.56                           | 0.005   | 0.55            | 0.06    |
| Current smoker               | 1.27                   | 0.1     | 1.38                           | 0.06    | 2.43            | < 0.001 |
| Diabetes                     | 1.67                   | < 0.001 | 1.49                           | 0.003   | 1.21            | 0.4     |
| Prior cardiovascular disease | 1.44                   | 0.001   | 2.11                           | < 0.001 | 1.24            | 0.3     |
| Systolic blood pressure*     | 1.07                   | 0.007   | 1.01                           | 0.8     | 1.11            | 0.02    |
| Urine albumin*               | 1.10                   | < 0.001 | 1.04                           | 0.06    | 1.09            | 0.006   |
| Triglyceride*                | 1.00                   | 0.4     | 1.01                           | 0.08    | 1.00            | 0.9     |
| ACEi / ARB use               | 1.30                   | 0.03    | 1.21                           | 0.2     | 1.11            | 0.6     |
| Beta blocker use             | 1.44                   | 0.001   | 1.59                           | < 0.001 | 1.33            | 0.2     |
| Loop diuretic use            | 1.55                   | < 0.001 | 1.17                           | 0.2     | 1.21            | 0.4     |
| Estimated GFR*               | 1.22                   | < 0.001 | 1.16                           | 0.02    | 1.07            | 0.4     |

*\*Body mass index per one kg/m<sup>2</sup> greater; Systolic blood pressure per 10 mmHg greater; Urine albumin per 50% greater; Triglycerides per 10 mg/dL greater; Estimated GFR per 10 mL/min/1.73m<sup>2</sup> lower*

<sup>a</sup> Results from Cox proportional hazard regression.

<sup>b</sup> Models included the summary secretion score as the exposure and adjusted for age, race, sex, clinical sites, educational attainment, smoking status, history of cardiovascular disease, diabetes, body mass index, systolic blood pressure, triglyceride, 24-hour urinary albumin excretion, ACEi/ARB, loop diuretics, beta blockers, and estimated GFR.
